# Supplementary material for: Covalent organic framework spherical nanofibers bearing carbon quantum dots for boosting photocatalytic hydrogen production
Source: Royal Society of Chemistry journal article supplement (doi:10.1039/d4ta07171a), 2024-12-04
Supplement: d4ta07171a1.pdf [file d4ta07171a1.pdf]

**Electronic Supplementary Information**

**Covalent organic framework spherical nanofibers bearing carbon quantum dots  
for boosting photocatalytic hydrogen production**

Jiyuan Zang,<sup>a</sup> Yuting Zhao,<sup>a</sup> Lei Yu,<sup>a</sup> David J. Young,<sup>\*b</sup> Zhi-Gang Ren<sup>a</sup> and Hong-Xi Li<sup>\*a</sup>

<sup>a</sup>College of Chemistry, Chemical Engineering and Materials Science, Soochow University, Suzhou 215123,

P. R. China. Email: lihx@suda.edu.cn

<sup>b</sup>James Watt School of Engineering, University of Glasgow, University Avenue, Glasgow, G12 8QQ UK.

Email: David.J.Young@glasgow.ac.uk

## EXPERIMENTAL SECTION

**Materials.** All chemicals used were of analytical grade or higher. Citric acid purchased from Macklin Inc. (Shanghai, China; purity greater than 99.5%). 2,4,6-tris(4-aminophenyl)-1,3,5-triazine purchased from Aladdin Chemistry Co. Ltd. (Shanghai, China; purity greater than 95%). 2,4,6-trihydroxybenzene-1,3,5-tricarbaldehyde purchased from Adamas-beta (Shanghai, China; purity greater than 98%).

**Synthesis of CQDs.** Citric acid (5 mmol) and ethylenediamine (335  $\mu$ L) were dissolved in 10 mL of deionized water. The mixed solution was added to a 25 mL Teflon Lin autoclave and heated at 200 °C for 5 h. After cooling to room temperature, the reaction mixture was subjected to dialysis for 24 h. After cooling to room temperature, this reaction solution was freeze-dried for 48 h to obtain solid CQDs.

**Synthesis of TAPT-COF.** To a Pyrex glass tube (50 mL) was added 2,4,6-trihydroxybenzene-1,3,5-tricarbaldehyde (TFP; 84 mg 0.4 mmol), 2,4,6-tris(4-aminophenyl)-1,3,5-triazine (TAPT; 141.2 mg, 0.4 mmol), mesitylene (3 mL), and 1,4-dioxane (3 mL). The mixture was ultrasonicated for 20 min and acetic acid (6 M, 0.6 mL) was added with a syringe. The glass tube was flash frozen in a N<sub>2</sub> liquid bath and degassed by three freeze-pump-thaw cycles and then then sealed. After standing at ambient temperature for 2 hours, the mixture was stirred at 120 °C for 3 days. The resulting orange precipitate was collected by centrifugation, and then washed with N,N-dimethylformamide, tetrahydrofuran and ethanol. The solids were then dried under vacuum at 80 °C for 24 h.

**Synthesis of TAPT-COF-CQDs-X.** TAPT-COF-CQDs-X (X = 1, 2, 3, 4, 5 mg) were prepared in a similar manner to that used for the preparation of TAPT-COF, but using CQDs (1, or 2, 3, 4, 5 mg), TFP (84 mg, 0.4 mmol), and TAPT (141.2 mg, 0.4 mmol) as starting materials.

**Synthesis of TAPT-COF/CQDs-3%.** A certain weight ratio of TAPT-COF to CQDs was mixed in ethanol (10 mL). The suspension was ultrasonicated for 2 h and dry at 80 °C. TAPT-COF/CQDs-3% is a sample with a weight percentage of 3 wt% of CQDs relative to TAPT-COF.

**Photocatalytic H<sub>2</sub> evolution.** To a quartz flask (200 mL) was added photocatalyst (10 mg), triethanolamine (TEOA; 5 mL), distilled water (50 mL), and Pt (3 wt% from 2.0 mg H<sub>2</sub>PtCl<sub>6</sub>). The mixture was sonicated for 30 min, then evacuated and flushed with nitrogen three times, and linked to a glass automatic on-line trace gas analysis system (Labsolar-6A, Beijing Perfect Light Technology Co., Ltd, China). The reaction was irradiated with a xenon lamp (300 W) with cutoff wavelengths of 420 nm or 520 nm, and maintained at 25 °C by water cooling. The amount of evolved H<sub>2</sub> was periodically measured using online gas chromatography (GC7900, Tianmei, China) with N<sub>2</sub> as the carrier gas.

**Photoelectrochemical characterization.** Electrochemical impedance spectroscopy (EIS) and transient photocurrent measurements were obtained on an electrochemical analyzer (CHI760E Instruments) with a conventional three-electrode cell with Pt wire as the counter electrode, Ag/AgCl as a reference electrode and 0.1 mol L<sup>-1</sup> Na<sub>2</sub>SO<sub>4</sub> as the electrolyte. The working electrode was prepared by spreading TAPT-COF-CQDs-

X (1 mg mL<sup>-1</sup> in isopropanol with 32 μL 5 wt% Nafion) on F-doped tin oxide glass. The light source was a xenon lamp (300 W) with a 420 nm or 520 nm cutoff filter.

**Apparent quantum efficiency (AQE) measurements.** AQE for H<sub>2</sub> evolution was measured under the illumination of a xenon lamp (300 W) with different bandpass filters of 420 ± 10 nm, 440 ± 10 nm, 460 ± 10 nm, and 520 ± 10 nm with intensities of 2.25, 2.97, 2.60 and 3.47 mW·m<sup>-2</sup>, respectively. Pure TAPT-COF or TAPT-COF-CQDs-3 was suspended in H<sub>2</sub>O (50 mL) with TEOA (5 mL) and H<sub>2</sub>PtCl<sub>6</sub> (2.0 mg). The irradiation area was confined to 3.14 × 3 cm<sup>2</sup>. The value of AQE was calculated according to the following equation:

$$\eta_{AQE} = \frac{N_e}{N_p} \times 100\%$$

$$= \frac{2 \times \eta \times N_A}{\frac{E_{total}}{E_{photon}}} \times 100\%$$

$$E_{total} = S \times P \times t$$

$$E_{photon} = h \times \frac{c}{\lambda}$$

$$\eta_{AQE} = \frac{2 \times n \times N_A \times h \times c}{S \times P \times t \times \lambda} \times 100\%$$

where N<sub>e</sub> is the number of generated electrons for H<sub>2</sub>, N<sub>p</sub> is the number of incident photons, n is the molar mass of H<sub>2</sub> molecules produced over 1 hour, λ is the wavelength of the monochromatic light (4.20 × 10<sup>-7</sup>, 4.40 × 10<sup>-7</sup>, 4.60 × 10<sup>-7</sup>, or 5.20 × 10<sup>-7</sup>m), S (the irradiation area) = 3.8 × 10<sup>-3</sup> m<sup>2</sup>, P is the intensity of irradiation light (W·m<sup>-2</sup>), N<sub>A</sub> (Avogadro constant) = 6.022 × 10<sup>23</sup> mol<sup>-1</sup>, h (the Planck's constant) = 6.626 × 10<sup>-34</sup> J·s, c (the light speed) = 3 × 10<sup>8</sup> m·s<sup>-1</sup>, t (the photoreaction time) = 3600 s.

**The adsorption free energy of a H atom.** The adsorption free energy for a H atom on a substrate was calculated using the model of Nørskov et al.:

$$\Delta G_H = \Delta E_H + \Delta E_{ZPE} - T\Delta S$$

where ΔE<sub>ZPE</sub> and ΔS are the changes of zero-point energy and entropy, T is the absolute temperature. ΔE<sub>ZPE</sub> – TΔS ≈ 0.26 eV is generally used for HER. ΔE<sub>H</sub> denotes the adsorption energy of a hydrogen atom on a substrate and was calculated by:

$$\Delta E_H = E(sub/H) - E(sub) - E(H_2)/2$$

where E(sub/H), E(sub) and E(H<sub>2</sub>) are the total energies of a H atom on a substrate, substrate alone and hydrogen gas, respectively.

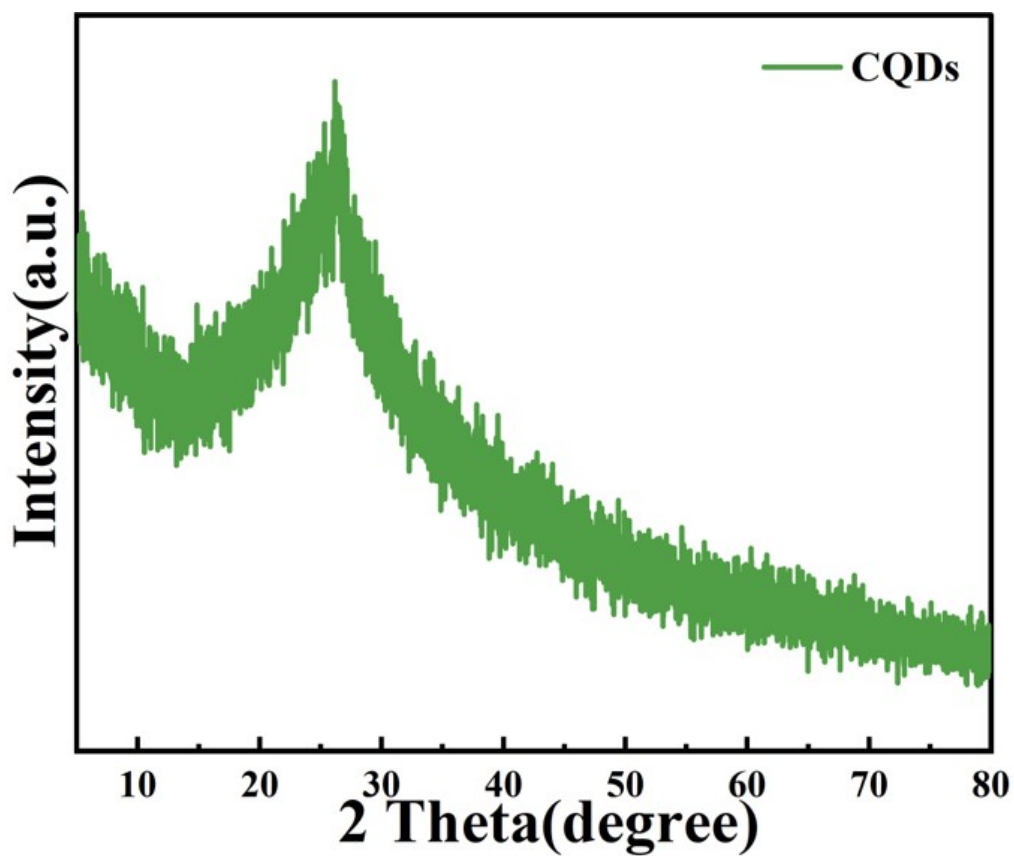

Fig. S1 PXRD patterns of CQDs.

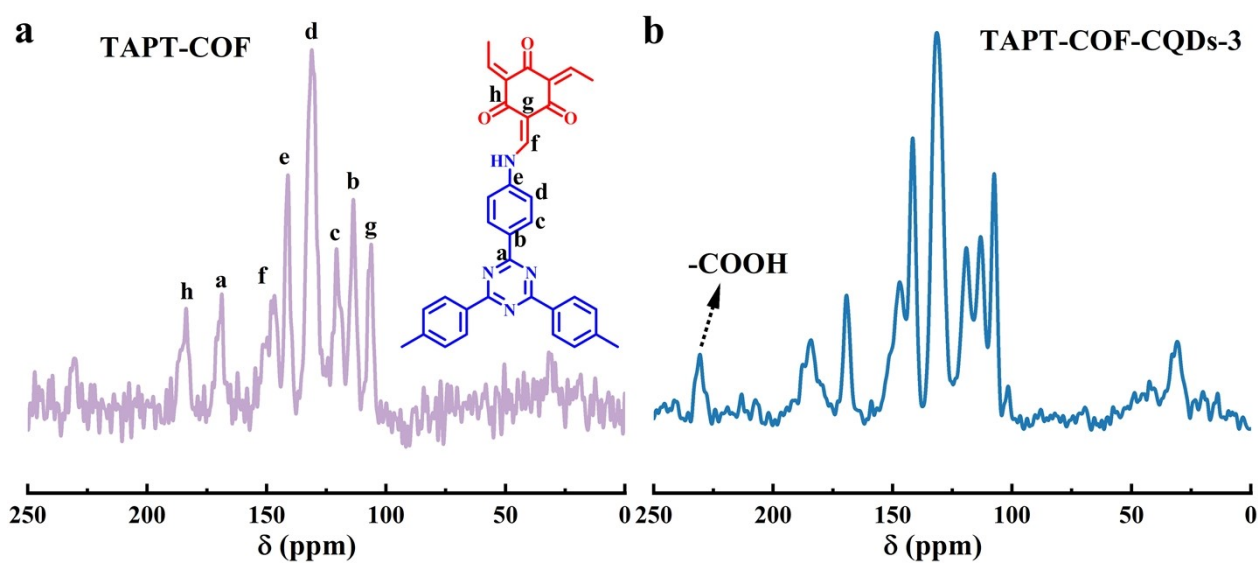

Fig. S2 Solid-state  $^{13}\text{C}$  NMR Spectra of TAPT-COF (a) and TAPT-COF-CQDs-3 (b).

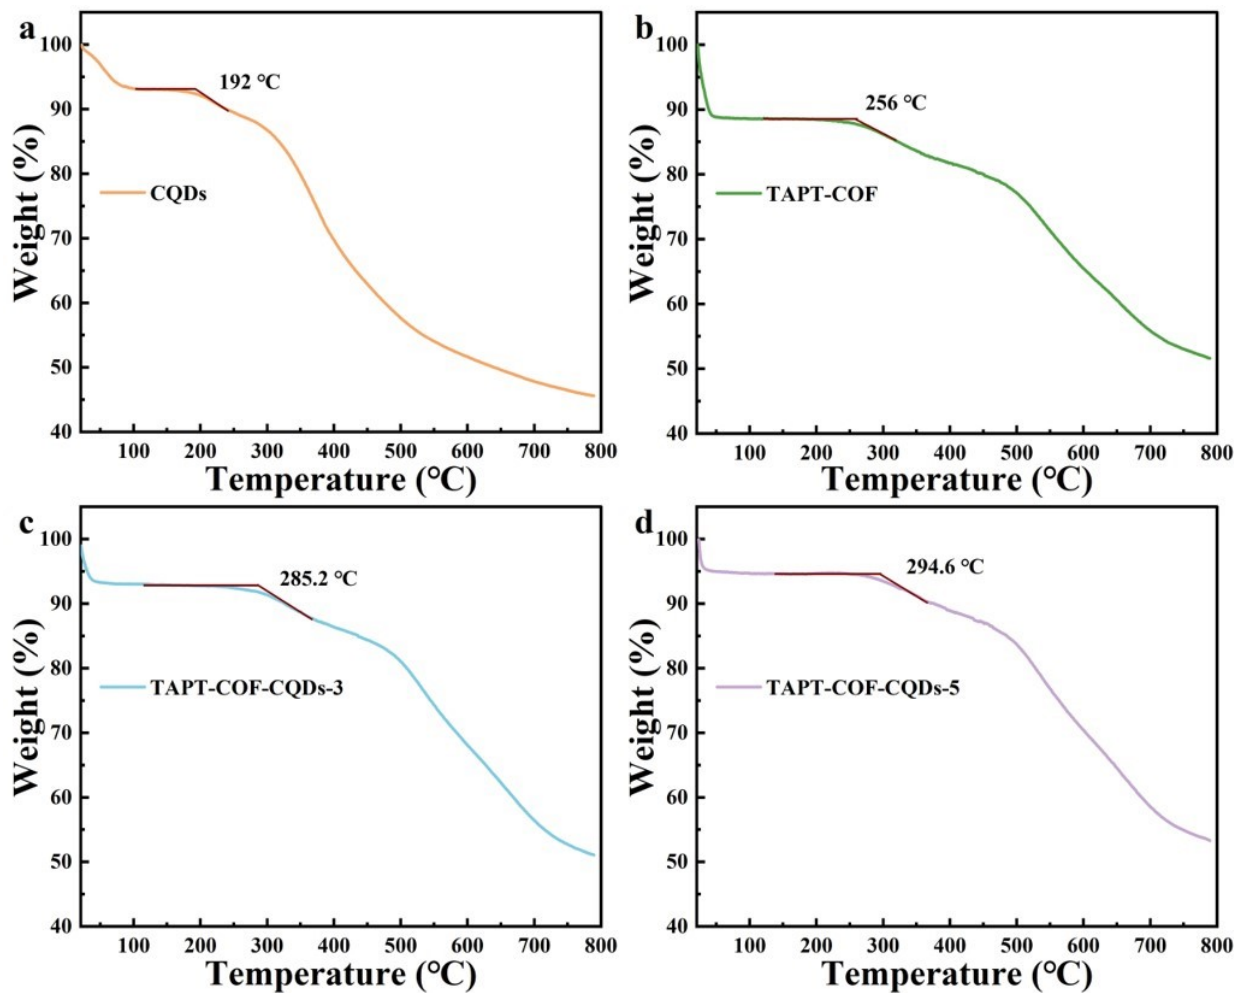

Fig. S3 TGA curves of (a) CQDs, (b) TAPT-COF, (c) TAPT-COF-CQDs-3, (d) TAPT-COF-CQDs-5.

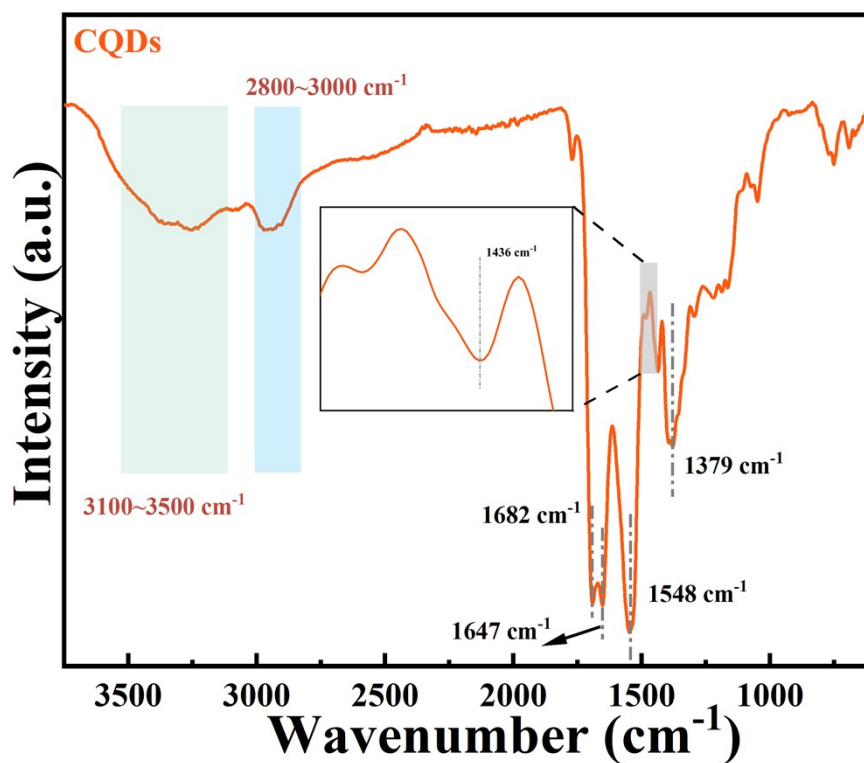

Fig. S4 FT-IR spectra of CQDs.

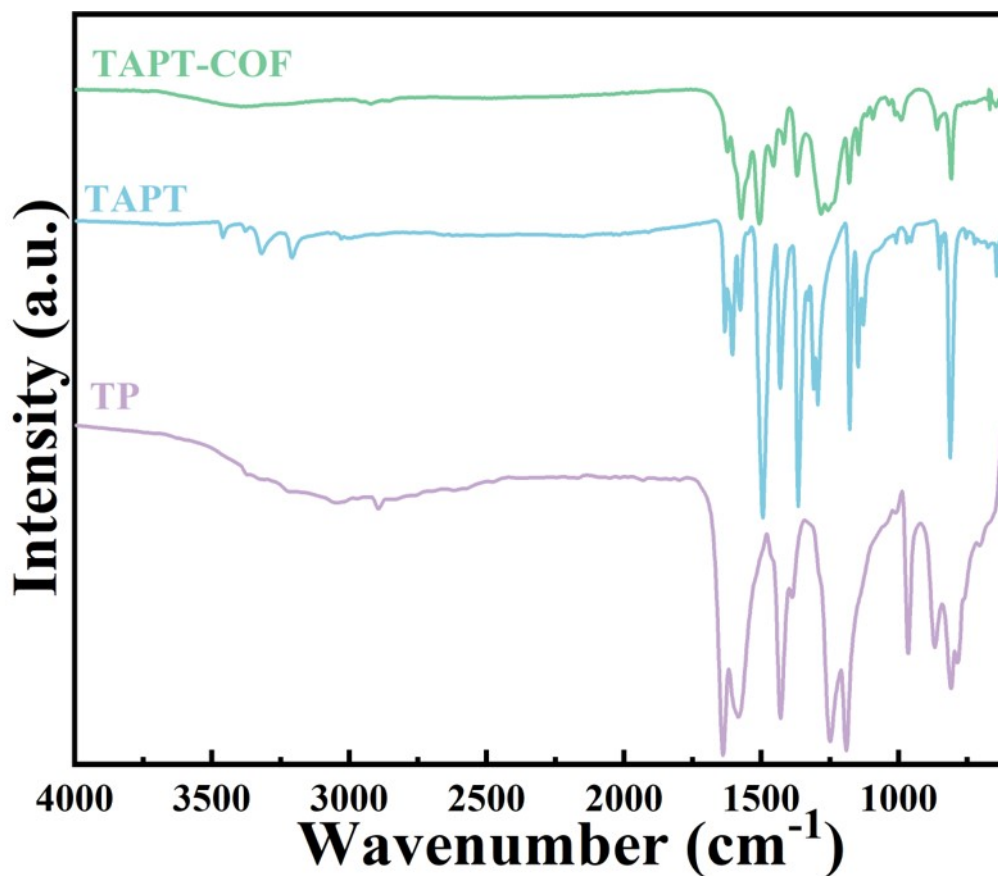

Fig. S5 FT-IR spectra of TAPT, TFP and TAPT-COF.

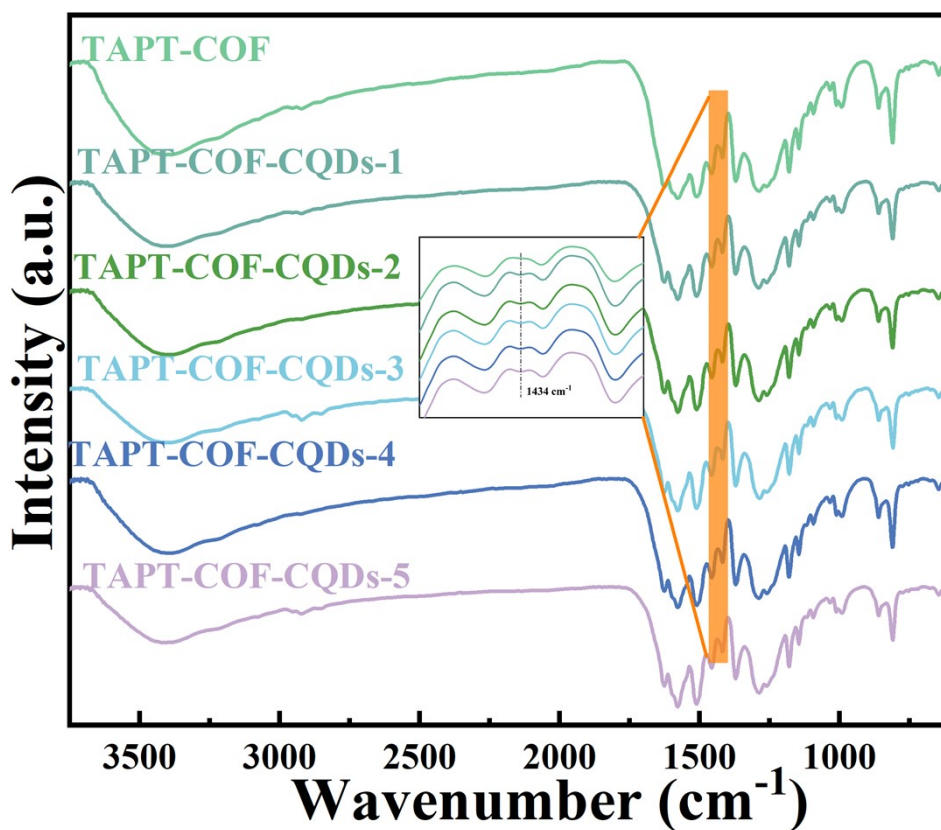

Fig. S6 FT-IR spectra of TAPT-COF-CQDs-X (X = 0, 1, 2, 3, 4, 5).

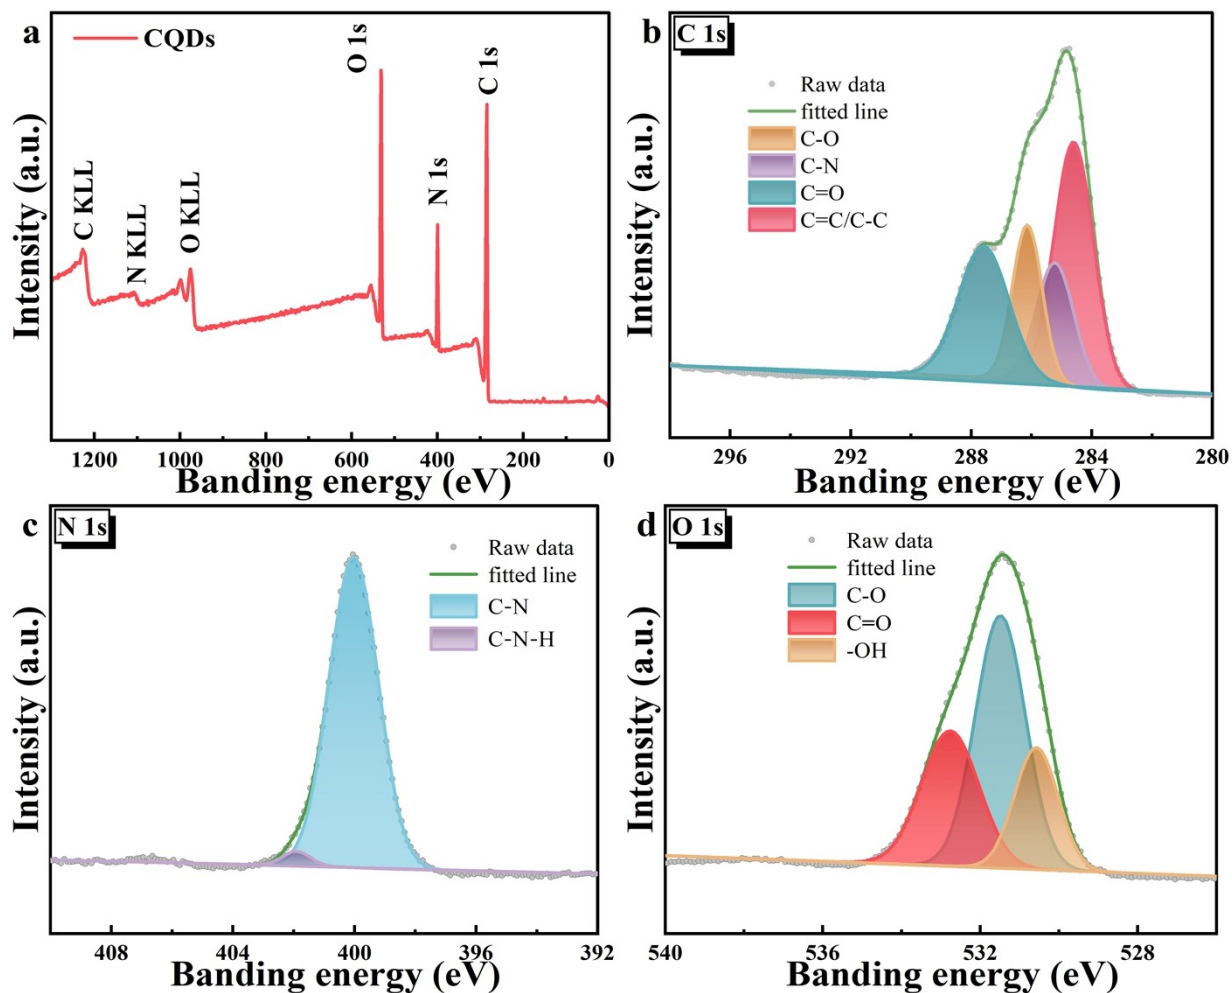

Fig. S7 (a) XPS survey spectra of CQDs. High-resolution XPS spectra of (b) C 1s and (c) O 1s and (d) N 1s of CQDs.

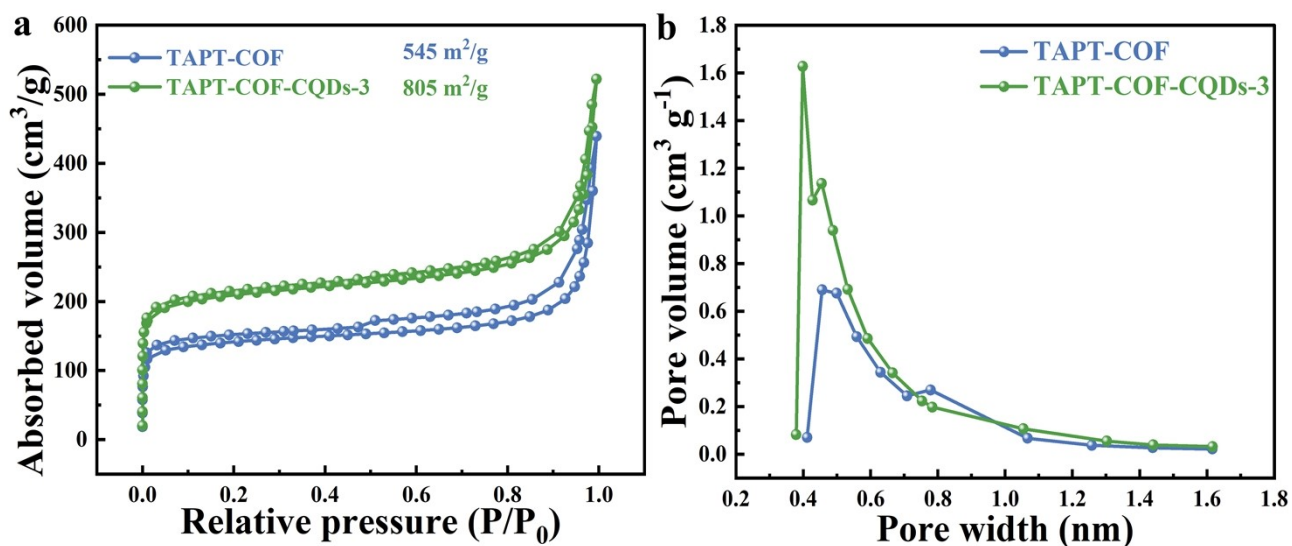

Fig. S8  $N_2$  adsorption-desorption isotherm (a) and pore size distribution (b) of TAPT-COF and TAPT-COF-CQDs-3.

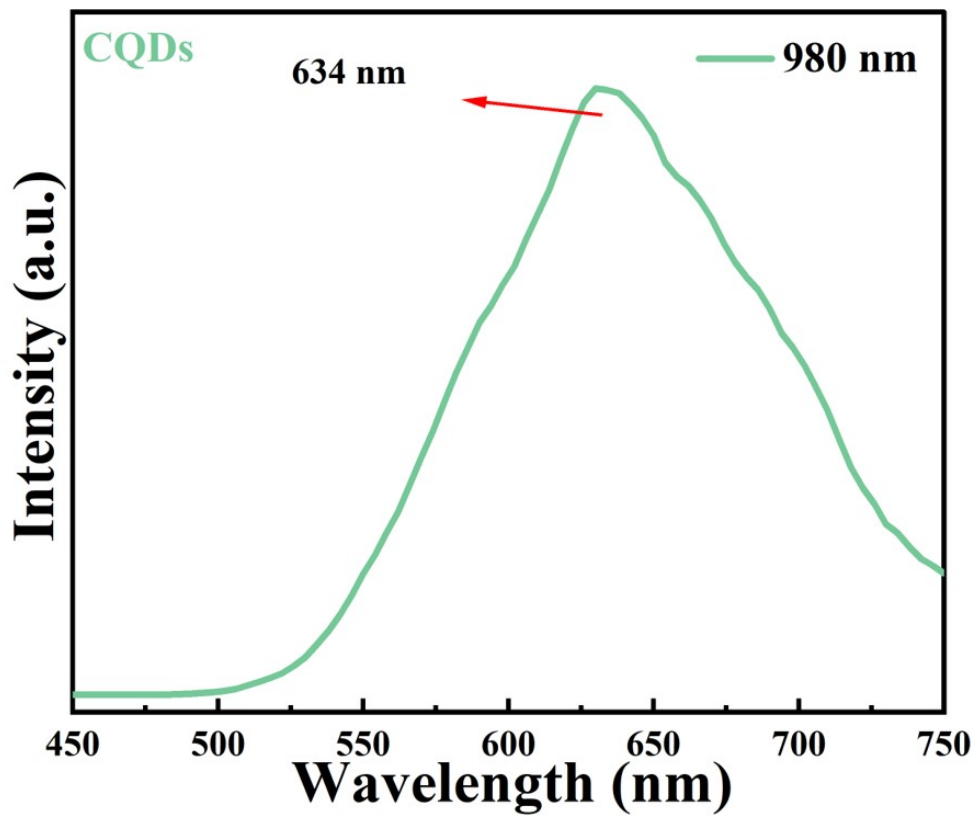

Fig. S9 Up-converted PL spectra of CQDs.

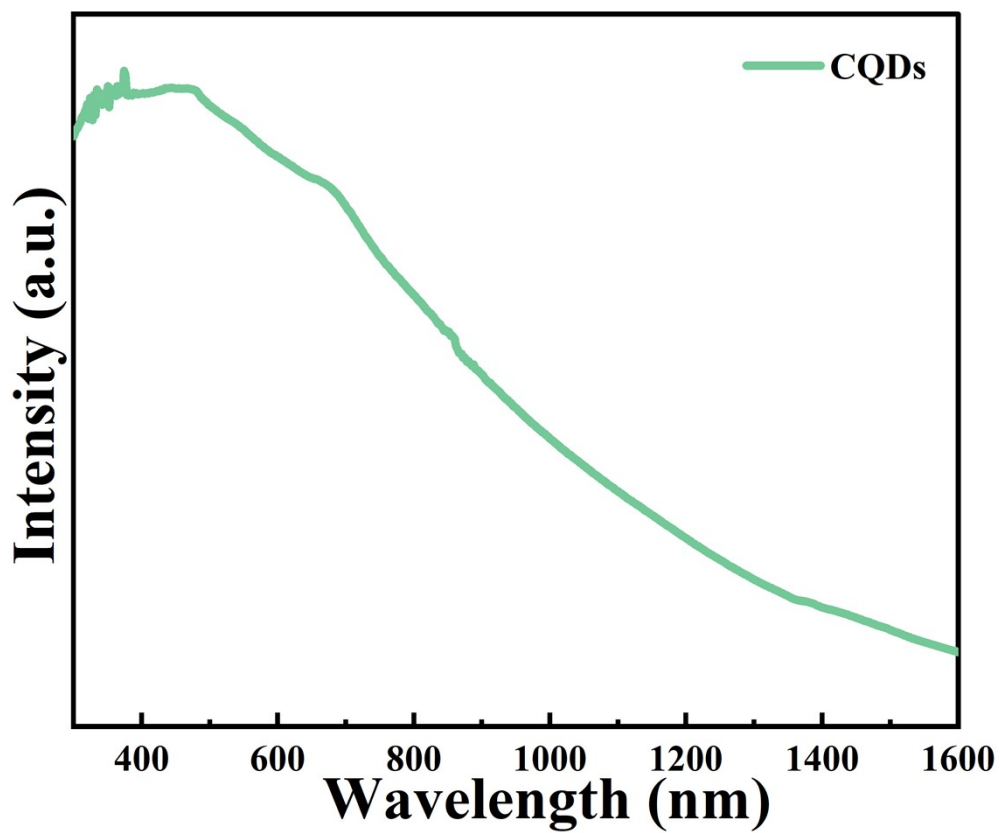

Fig. S10 UV-vis diffuse reflectance spectra (UV-DRS) of CQDs.



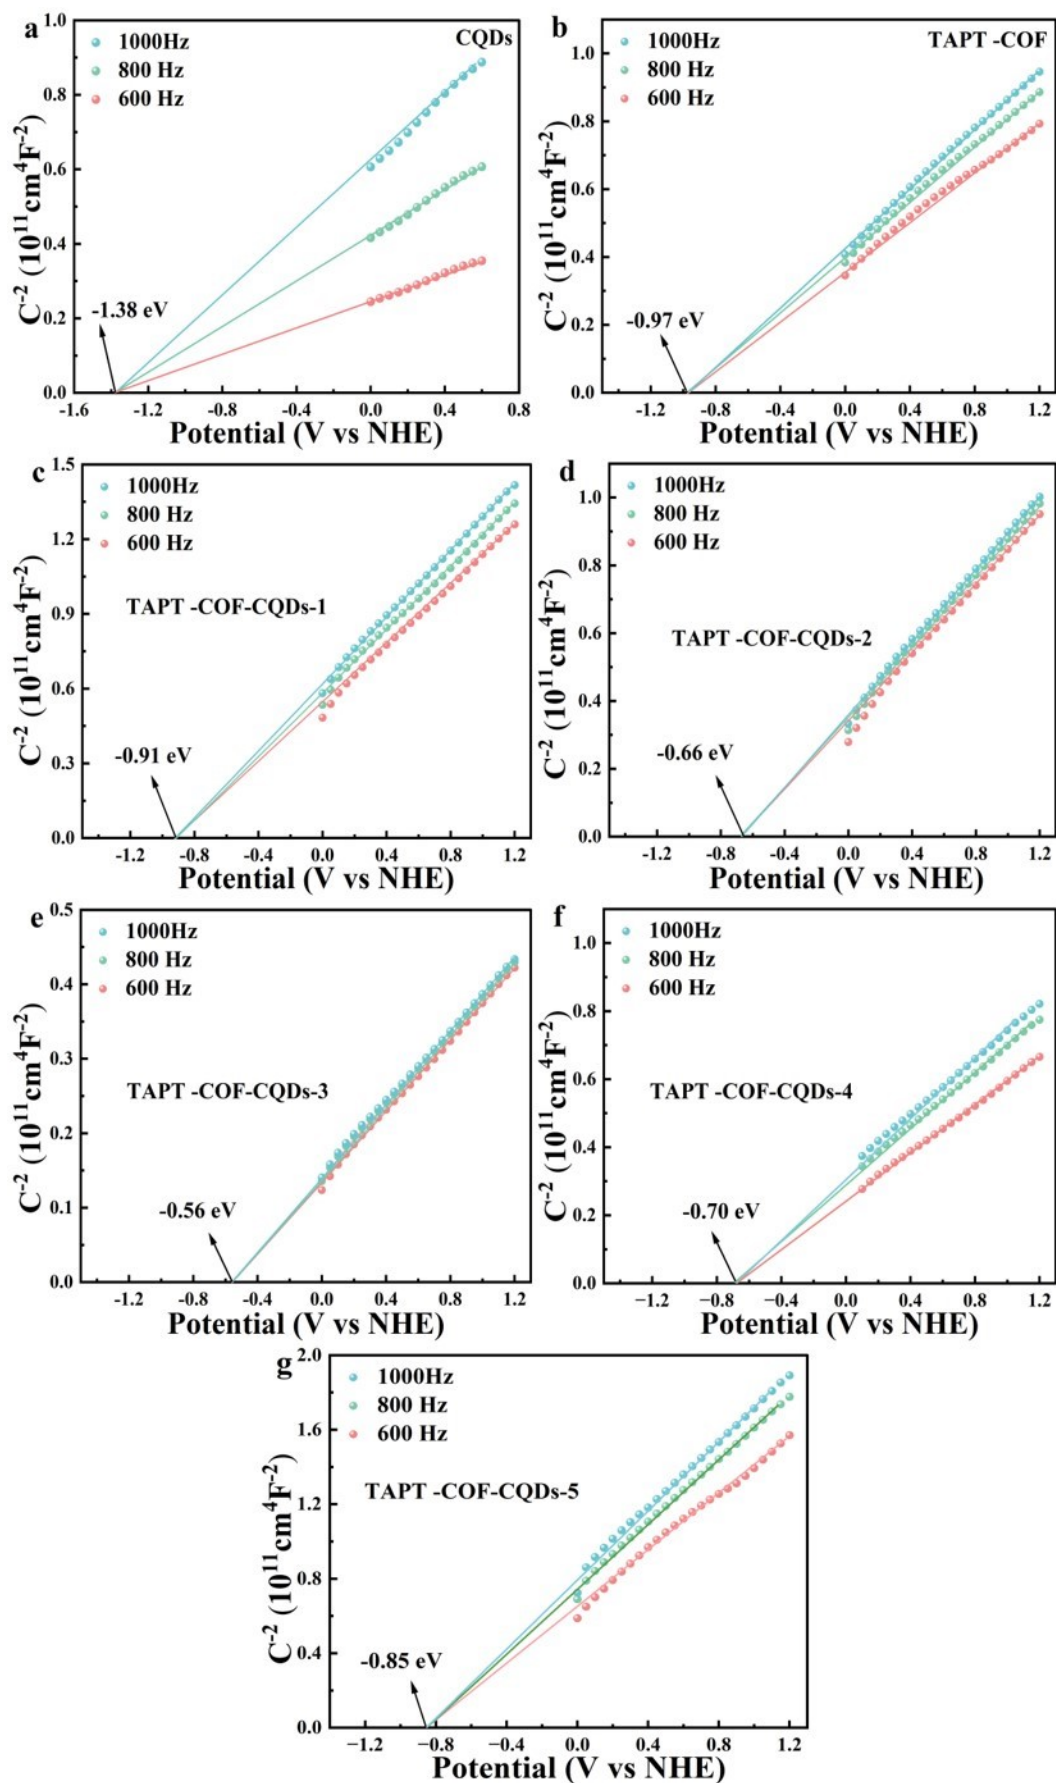

**Fig. S11** Mott-Schottky plots of CQDs and TAPT-COF-CQDs-X (X=0, 1, 2, 3, 4, 5).

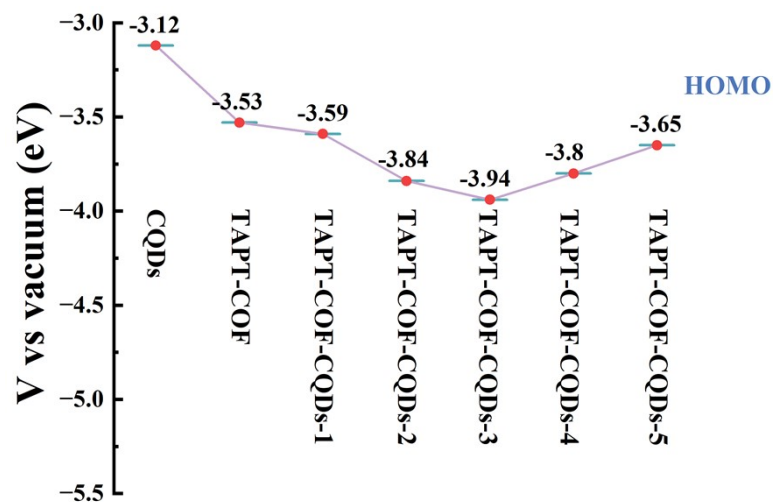

Fig. S12 HOMO positions of the photocatalysts.

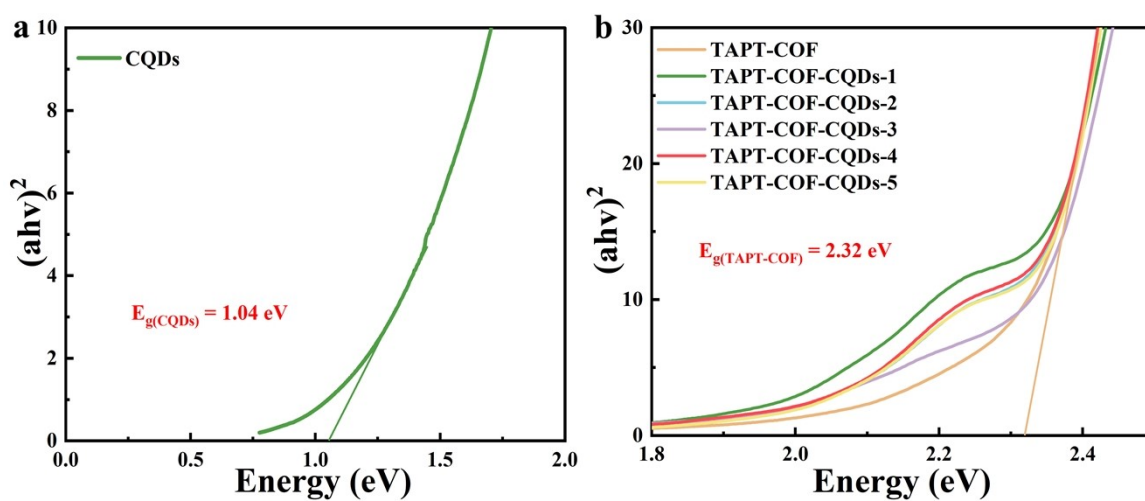

Fig. S13 Tauc plots of CQDs (a) and TAPT-COF-CQDs-X (X=0, 1, 2, 3, 4, 5) (b).

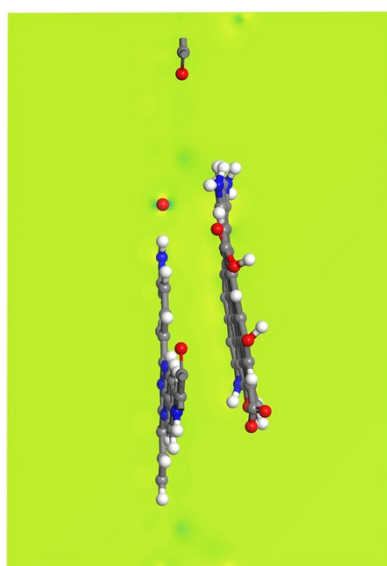

Fig. S14 The electron localization function (including cut) of TAPT-COF-CQDs.

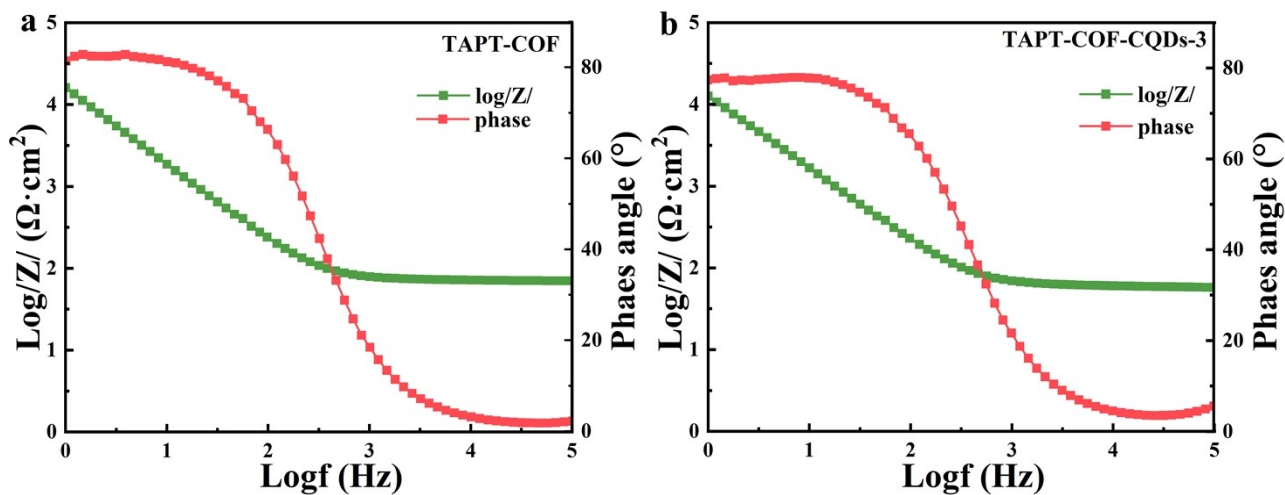

Fig. S15 The Bode plots of TAPT-COF (a) and TAPT-COF-CQDs (b).

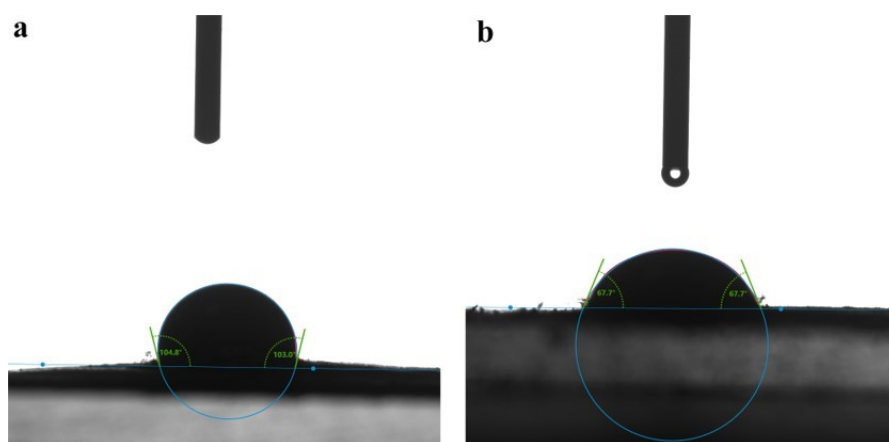

Fig. S16 Water contact angle measurements of (a) TAPT-COF and (b) TAPT-COF-CQDs-3.

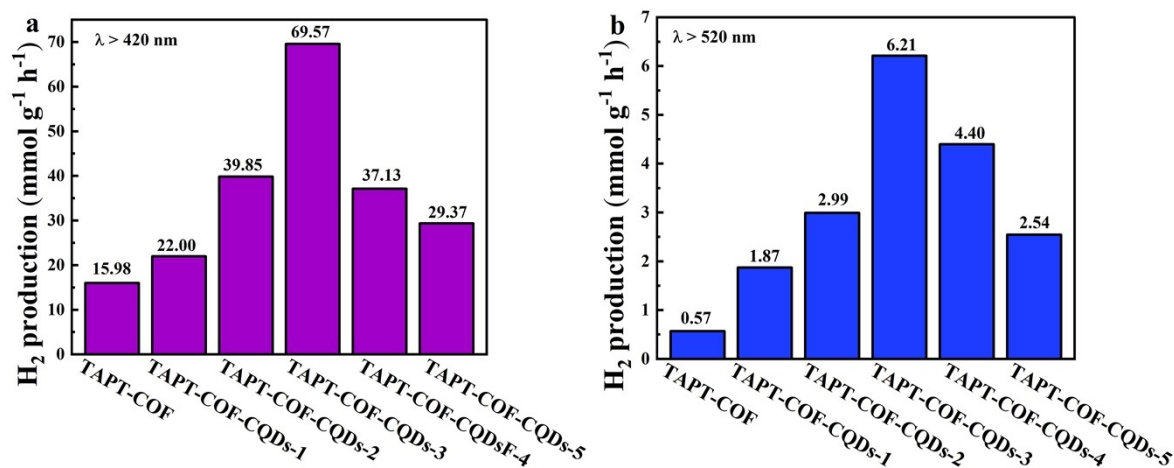

Fig. S17 Hydrogen production performance under (a)  $\lambda \geq 420$  nm (b)  $\lambda \geq 520$  nm.

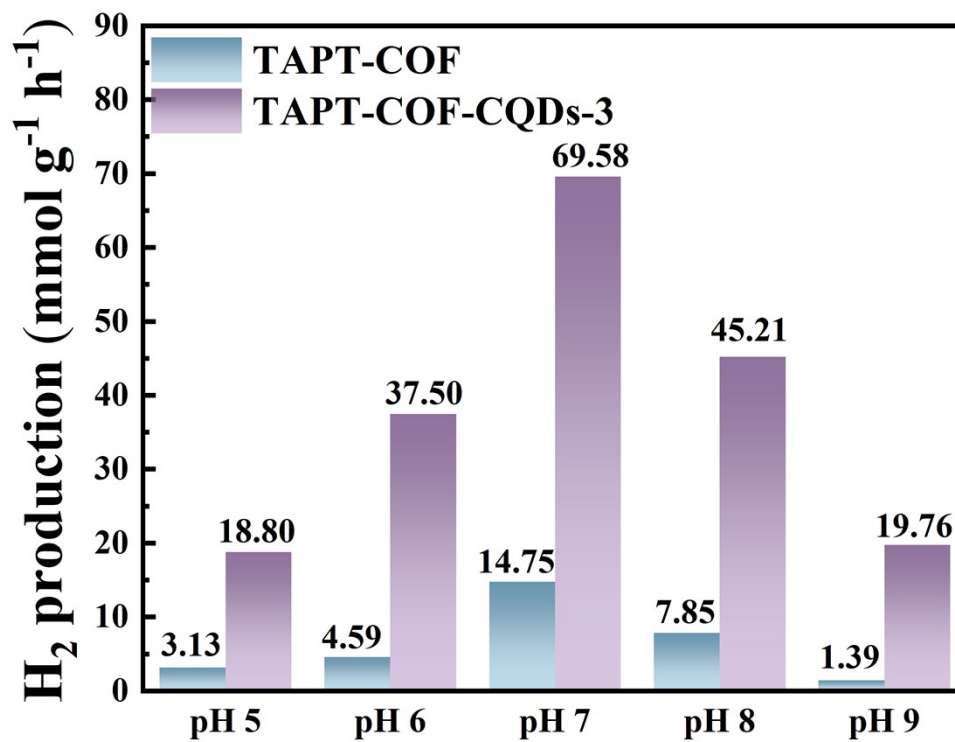

Fig. S18 Hydrogen production performance for TAPT-COF and TAPT-COF-3 at different pH.

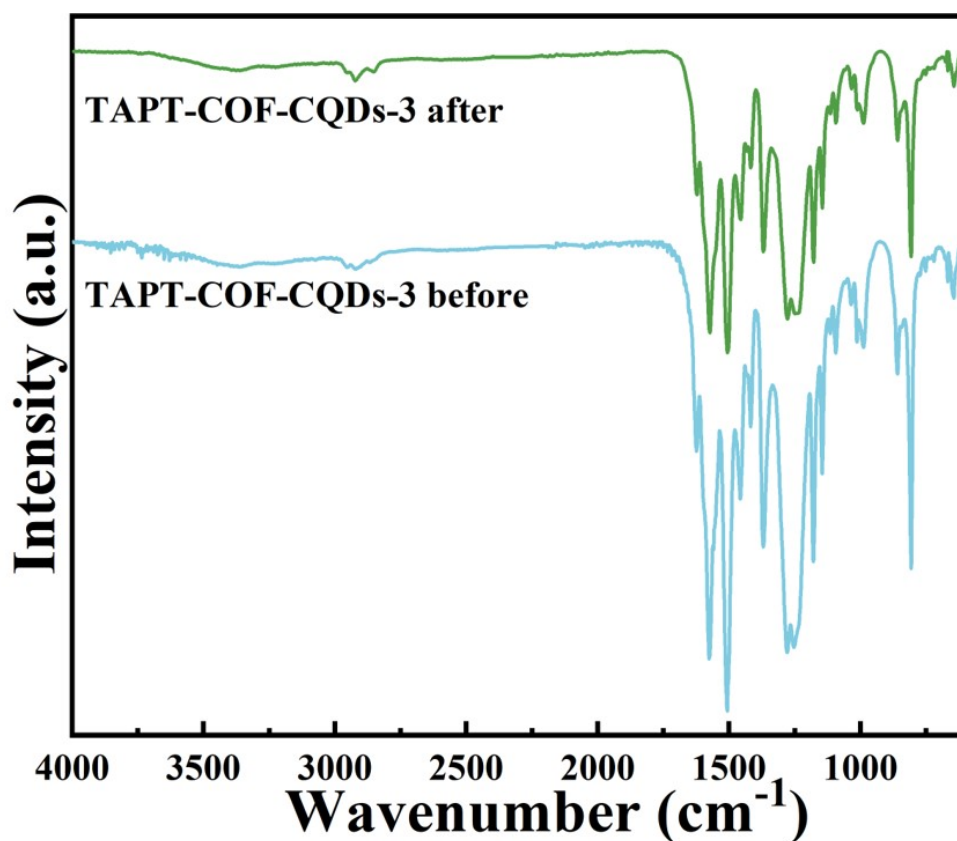

Fig. S19 FT-IR spectra of TAPT-COF-CQDs-3 before and after photocatalysis.

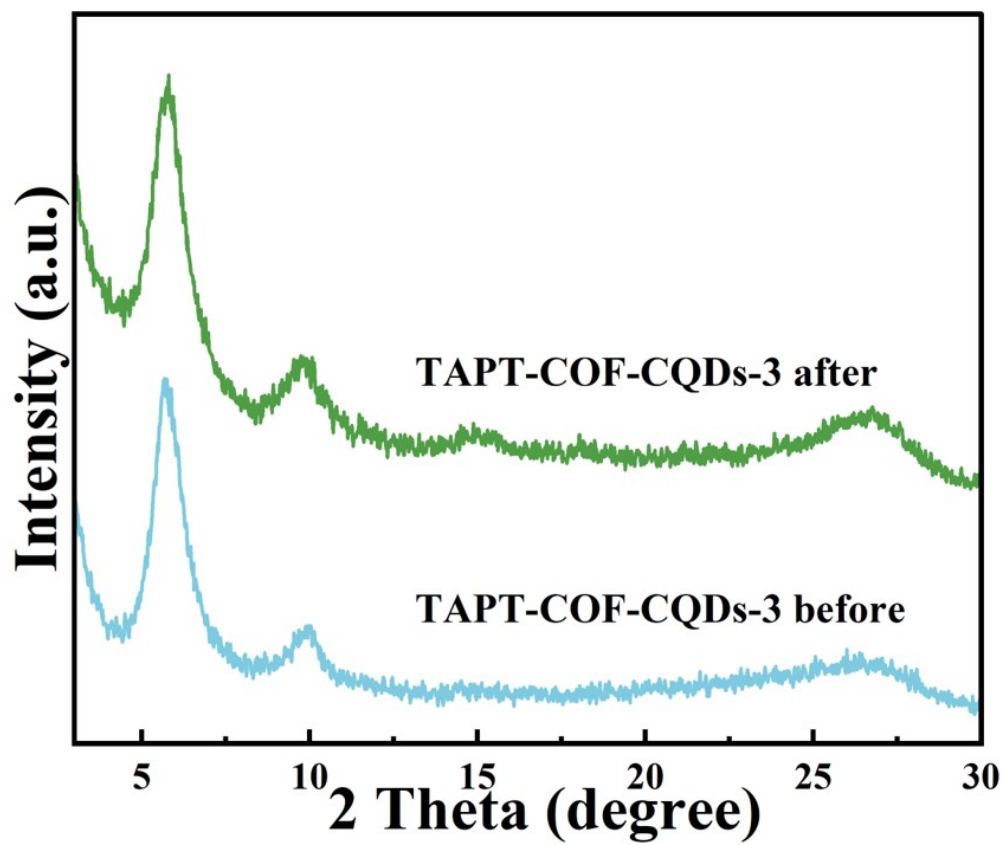

Fig. S20 PXRD patterns of TAPT-COF-CQDs-3 before and after photocatalysis.

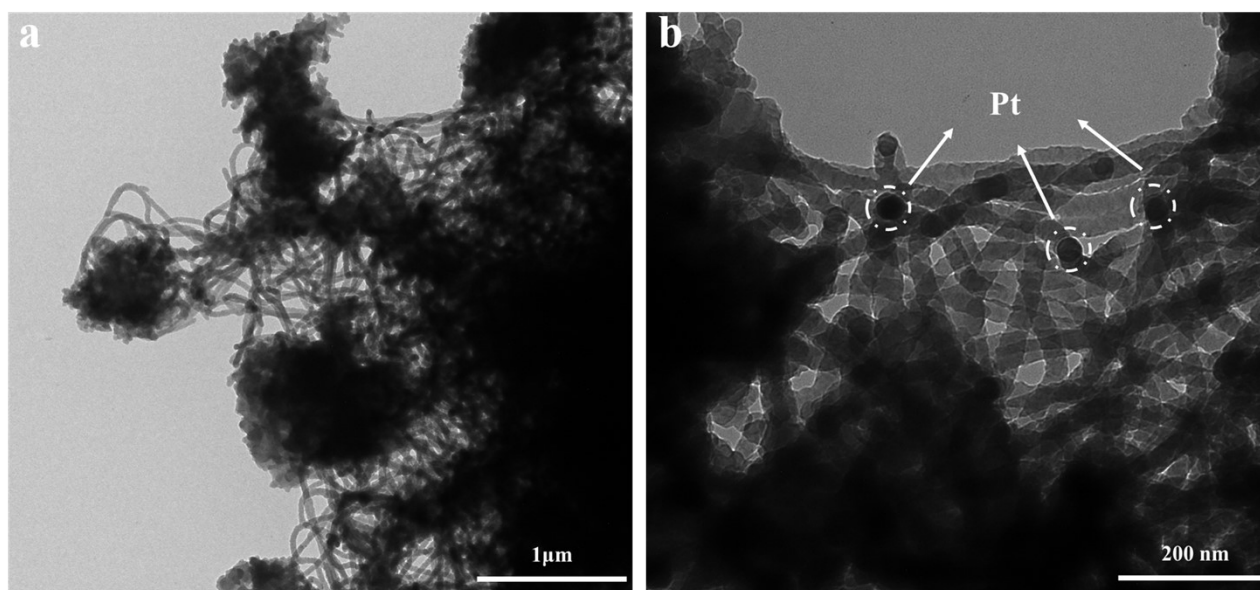

Fig. S21 TEM of TAPT-COF-CQDs-3 before photocatalysis.

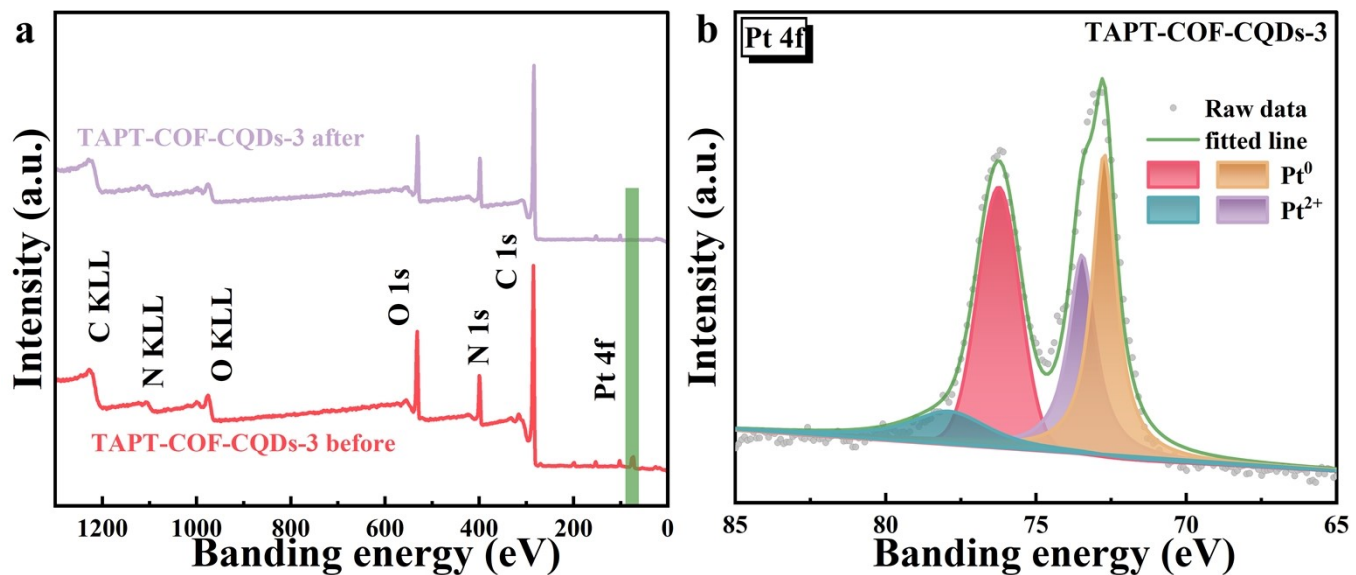

**Fig. S22** Full XPS spectra (a) and high-resolution Pt 4f XPS spectra (b) of TAPT-COF-CQDs-3 after the photocatalytic reaction.

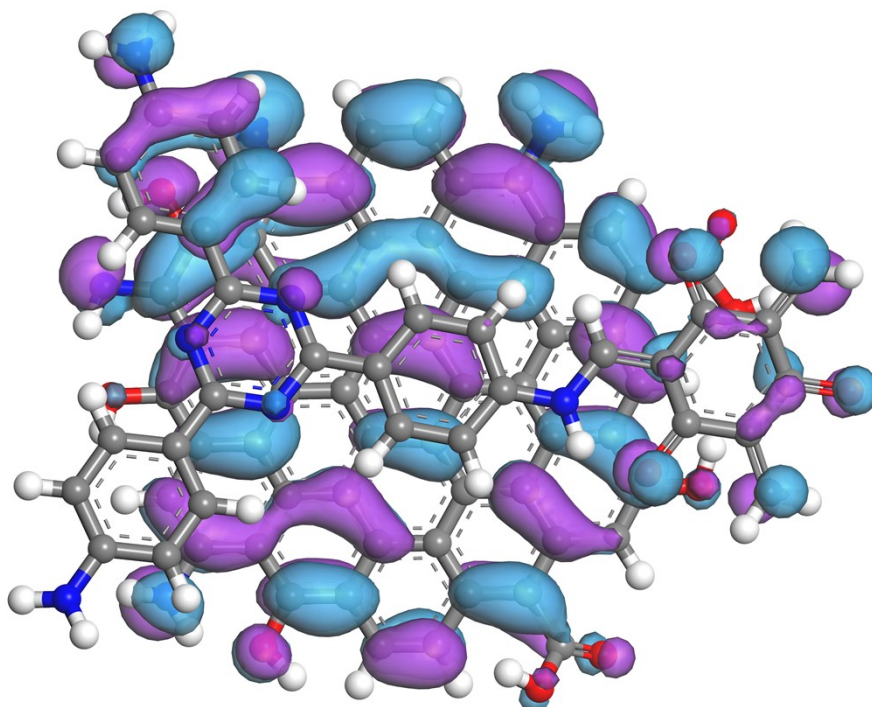

**Fig. S23** HOMO of TAPT-COF-CQDs (001) heterojunction from the top view.

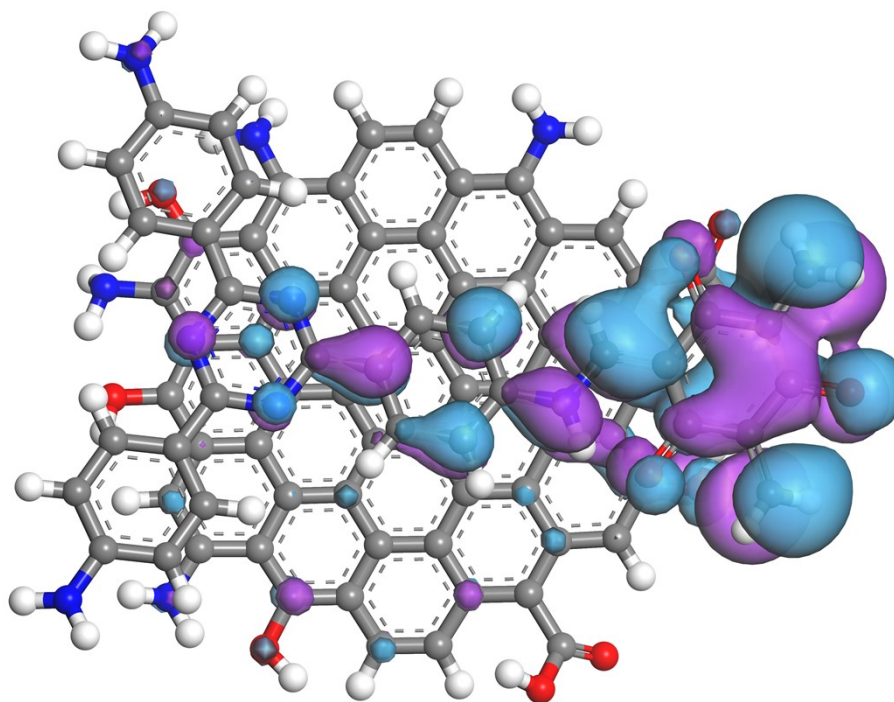

**Fig. S24** LUMO of TAPT-COF-CQDs (001) heterojunction from the top view.

**Table:**

**Table S1** The peak position, area, and proportion of C 1s in XPS of TAPT-COF and TAPT-COF-CQDs-3.

|                 |          | C=O    | C=N    | C-N   | C=C    |
|-----------------|----------|--------|--------|-------|--------|
| TAPT-COF        | Location | 289.2  | 286.4  | 285.5 | 284.6  |
|                 | Area     | 13940  | 19599  | 2040  | 36319  |
|                 | Ratio    | 19.39% | 27.26% | 2.84% | 50.51% |
| TAPT-COF-CQDs-3 | Location | 289.6  | 286.4  | 285.1 | 284.6  |
|                 | Area     | 13494  | 19490  | 6727  | 30846  |
|                 | Ratio    | 19.12% | 27.62% | 9.53% | 43.72% |

**Table S2** The peak position, area, and proportion of N 1s in XPS of TAPT-COF and TAPT-COF-CQDs-3.

|                 |          | C-N-H  | C-N    | C=N    |
|-----------------|----------|--------|--------|--------|
| TAPT-COF        | Location | 402.33 | 400.08 | 398.58 |
|                 | Area     | 2356   | 8703   | 7055   |
|                 | Ratio    | 13.01% | 48.05% | 38.95% |
| TAPT-COF-CQDs-3 | Location | 404.8  | 400.1  | 398.6  |
|                 | Area     | 1399   | 11689  | 7046   |
|                 | Ratio    | 6.95%  | 58.06% | 35.00% |

**Table S3** The peak position, area, and proportion of O 1s in XPS of TAPT-COF and TAPT-COF-CQDs-3.

|                 |          | -OH    | C-O    | C=O    |
|-----------------|----------|--------|--------|--------|
| TAPT-COF        | Location | 533.5  | 531.7  | 530.6  |
|                 | Area     | 5058   | 15752  | 4757   |
|                 | Ratio    | 19.88% | 61.54% | 18.58% |
| TAPT-COF-CQDs-3 | Location | 533.3  | 531.97 | 530.88 |
|                 | Area     | 6642   | 7551   | 10572  |
|                 | Ratio    | 26.82% | 30.49% | 42.69% |

**Table S4** Fluorescence lifetime decay obtained by exciting TAPT-COF and TAPT-COF-CQDs-3 with a

$$\lambda_{\text{ex}} = 375 \text{ nm laser.}$$

|                 | B <sub>1</sub> | $\tau_1/\text{ns}$ | B <sub>2</sub> | $\tau_2/\text{ns}$ | B <sub>3</sub> | $\tau_3/\text{ns}$ | $\tau_{\text{avg}}/\text{ns}$ |
|-----------------|----------------|--------------------|----------------|--------------------|----------------|--------------------|-------------------------------|
| TAPT-COF        | 9756.092       | 0.995              | 1835.421       | 0.995              | 1903.4376      | 3.072              | 1.69                          |
| TAPT-COF-CQDs-3 | 6181.251       | 0.851              | 9252.845       | 0.851              | 1048.790       | 3.020              | 1.27                          |



**Table S5** Comparison of photocatalytic HER performances of reported composite porous materials.

| Photocatalyst                                | Sacrificial | Co-catalyst             | Light (nm) | Activity ( $\mu\text{mol g}^{-1} \text{h}^{-1}$ ) | Ref.      |
|----------------------------------------------|-------------|-------------------------|------------|---------------------------------------------------|-----------|
| TAPT-COF-CQDs-3                              | TEOA        | Pt                      | 420        | 69512                                             | This work |
| CN/TMP                                       | TEOA        | Pt                      | 200        | 2057                                              | S1        |
| NH <sub>2</sub> -MIL@SNW-1                   | TEOA        | Pt                      | 420        | 1949                                              | S2        |
| In <sub>2</sub> O <sub>3</sub> /BDA-DHTA-COF | AA          | Pt                      | 420        | 9691                                              | S3        |
| CTF-1/rGO-2                                  | TEOA        | Pt                      | 420        | 894                                               | S4        |
| C <sub>0.24</sub> /CTF-1                     | TEOA        | Pt                      | 400        | 2240                                              | S5        |
| COF/CN                                       | AA          | Pt                      | 380        | 27540                                             | S6        |
| CdS/COF                                      | AA          | Pt                      | 420        | 15100                                             | S7        |
| CTF@Au@TiO <sub>2</sub>                      | TEOA        | Au, Chloroplatinic acid | 420        | 4288                                              | S8        |
| Tz-TA/g-C <sub>3</sub> N <sub>4</sub>        | TEOA        | Pt                      | 420        | 5426                                              | S9        |
| MOF/COF                                      | TEOA        | Pt                      | 420        | 360                                               | S10       |

AA = ascorbic acid; TEOA = triethanolamine.

## References:

- S1. L. Wang, R. Lian, Y. Zhang, X. Ma, J. Huang, H. She, C. Liu and Q. Wang, *Appl. Catal. B: Environ.*, 2022, **315**, 121568.
- S2. Y. Wan, H. Yang, Q. Shang, Q. Cheng, H. Zhou and Z. Pan, *Environ. Sci-Nano*, 2022, **9**, 3081-3093.
- S3. J. Yi, L. Zhang, W. Wang, Q. Yi, H. Wu, J. Li and J. Guo, *Fuel*, 2024, **355**, 129470.
- S4. Z. Tan, P. Zhang, Q. Chen, S. Fang, G. Huang, J. Bi and L. Wu, *Catal. Sci. Technol.*, 2021, **11**, 1874-1880.
- S5. Y. Chen, G. Huang, Y. Gao, Q. Chen and J. Bi, *Int. J. Hydrogen Energ.*, 2022, **47**, 8739-8748.
- S6. A. E. Hassan, A. M. Elewa, M. S. A. Hussien, A. F. M. El-Mahdy, I. M. A. Mekhemer, I. S. Yahia, T. A. Mohamed, H. H. Chou and Z. Wen, *J. Colloid Interf. Sci.*, 2024, **653**, 1650-1661.
- S7. G. Sun, J. Zhang, B. Cheng, H. Yu, J. Yu and J. Xu, *Chem. Eng. J.*, 2023, **476**, 146818.
- S8. X. Han, Y. Dong, J. Zhao, S. Ming and Y. Xie, *Int. J. Hydrogen Energ.*, 2022, **47**, 18334-18346.
- S9. M. Liu, F. Zhao, Y. Chu, J. Zhao, F. Meng and Y. Han, *Chem. Eng. Sci.*, 2024, **288**, 119827.
- S10. F. Li, D. Wang, Q. Xing, G. Zhou, S. Liu, Y. Li, L. Zheng, P. Ye and J. Zou, *Appl. Catal. B: Environ.*, 2019, **243**, 621-628.
